# Supplementary material for: INterpreting the Processes of the UMPIRE Trial (INPUT): protocol for a qualitative process evaluation study of a fixed-dose combination (FDC) strategy to improve adherence to cardiovascular medications
Source: PubMed Central journal article supplement — BMJ Open. 2013 May 22;3(5):e002313. doi: 10.1136/bmjopen-2012-002313 (PMC3664347; doi:10.1136/bmjopen-2012-002313), 2013-05-22
Supplement: bmjopen-2012-002313.reviewer_comments.pdf [file bmjopen-2012-002313.reviewer_comments.pdf]

## PEER REVIEW HISTORY

BMJ Open publishes all reviews undertaken for accepted manuscripts. Reviewers are asked to complete a checklist review form ([see an example](#)) and are provided with free text boxes to elaborate on their assessment. These free text comments are reproduced below. Some articles will have been accepted based in part or entirely on reviews undertaken for other BMJ Group journals. These will be reproduced where possible.

### ARTICLE DETAILS

|                            |                                                                                                                                                                                                                |
|----------------------------|----------------------------------------------------------------------------------------------------------------------------------------------------------------------------------------------------------------|
| <b>TITLE (PROVISIONAL)</b> | INterpreting the Processes of the UMPIRE Trial (INPUT): the design of a process evaluation of a fixed dose combination (FDC) strategy to improve adherence to cardiovascular medications - a qualitative study |
| <b>AUTHORS</b>             | Stewart, Frances; Salam, Abdul; Singh, Kavita; Thom, Simon; Williams, Hilarie; Patel, Anushka; Jan, Stephen; Prabhakaran, Dorairaj; Maulik, Pallab; Day, Sophie; Ward, Helen                                   |

### VERSION 1 - REVIEW

|                        |                                                                                                                                                               |
|------------------------|---------------------------------------------------------------------------------------------------------------------------------------------------------------|
| <b>REVIEWER</b>        | Elsayed Z. Soliman MD, MSc, MS, FAHA, FACC<br>Epidemiological Cardiology Research Center<br>Wake Forest University School of Medicine<br>Medical Center Blvd. |
| <b>REVIEW RETURNED</b> | 28-Nov-2012                                                                                                                                                   |

|                                  |                                                                                                                                                                                                                        |
|----------------------------------|------------------------------------------------------------------------------------------------------------------------------------------------------------------------------------------------------------------------|
| <b>RESULTS &amp; CONCLUSIONS</b> | This is a methodology paper with no results yet                                                                                                                                                                        |
| <b>GENERAL COMMENTS</b>          | Well written methodology paper for the design of a process evaluation in a polypill trial. Although I think this paper may fit a clinical trial journal, there could some interest to the readers of this journal too. |

|                        |                                                                                                                                                                                       |
|------------------------|---------------------------------------------------------------------------------------------------------------------------------------------------------------------------------------|
| <b>REVIEWER</b>        | Dr Christopher McKeivitt<br>Reader in Social Science & Health<br>King's College London<br>Capital House 7th Floor<br>42 Weston Street<br>London SE1 3QD<br><br>No competing interests |
| <b>REVIEW RETURNED</b> | 14-Mar-2013                                                                                                                                                                           |

|                         |                                                                                                                                                                                                                                                                                                                                                                                                                                                                                                                                                                                                                          |
|-------------------------|--------------------------------------------------------------------------------------------------------------------------------------------------------------------------------------------------------------------------------------------------------------------------------------------------------------------------------------------------------------------------------------------------------------------------------------------------------------------------------------------------------------------------------------------------------------------------------------------------------------------------|
| <b>THE STUDY</b>        | This is a protocol paper for a qualitative study therefore some of the No responses above are because the questions are not appropriate.                                                                                                                                                                                                                                                                                                                                                                                                                                                                                 |
| <b>GENERAL COMMENTS</b> | This paper is well written and clear. I have only minor comments.<br>Page 4: It wasn't clear which further in-depth views of the literature might be warranted.<br>Page 7: it wasn't clear what the INPUT standard operating procedures are.<br>Page 7: The use of photographs wasn't fully justified, nor was the method referenced. The following might be useful: Clark-Ibanez, M. (2004) Framing the social world with photo-elicitation interviews, American Behavioral Scientist, 47, 12, 1507–27; Collier, J. (1967) Visual Anthropology: Photography as a Research Method. New York: Holt, Rinehart and Winston. |

|  |                                                                                                                                                                                                                                                                                                                                                                                                                                                                                                                                                      |
|--|------------------------------------------------------------------------------------------------------------------------------------------------------------------------------------------------------------------------------------------------------------------------------------------------------------------------------------------------------------------------------------------------------------------------------------------------------------------------------------------------------------------------------------------------------|
|  | <p>Page 8: I didn't understand what was meant by the following:<br/> "Repeated reading of the interview transcripts will occur for compound meaning."<br/> "Existing literature will be used to delimit the framework..."</p> <p>Page 11: I didn't understand what was meant by the following:<br/> "...the poignant themes arising from interviews..."<br/> "There are several key areas that dissemination will likely focus..."</p> <p>Page 12: I thought the section beginning "Complexity and cost..." might be better in the introduction.</p> |
|--|------------------------------------------------------------------------------------------------------------------------------------------------------------------------------------------------------------------------------------------------------------------------------------------------------------------------------------------------------------------------------------------------------------------------------------------------------------------------------------------------------------------------------------------------------|

### VERSION 1 – AUTHOR RESPONSE

Comments by Elsayed Z. Soliman

Reviewer comment: Well written methodology paper for the design of a process evaluation in a polypill trial. Although I think this paper may fit a clinical trial journal, there could some interest to the readers of this journal too.

Author response: No response required.

Comments by Dr Christopher McKevitt

Reviewer comment: This paper is well written and clear. I have only minor comments Page 4: It wasn't clear which further in-depth views of the literature might be warranted."

Author response: To add clarity the following phrase was inserted to the sentence; " and the emerging themes"

Reviewer comment: Page 7: it wasn't clear what the INPUT standard operating procedures are.

Author response: Page 7, wording of sentence adjusted, "To ensure similar methods are followed for data collection and analysis in the UK and India standard operating procedures have been written and will be followed throughout the study"

Reviewer comment: The use of photographs wasn't fully justified, nor was the method referenced. The following might be useful: Clark-Ibanez, M. (2004) Framing the social world with photo-elicitation interviews, *American Behavioral Scientist*, 47, 12, 1507–27; Collier, J. (1967) *Visual Anthropology: Photography as a Research Method*. New York: Holt, Rinehart and Winston.

Author response: To aid clarity inserted "and provide further information about the context of the trial"

And provided references to justify reasoning and methodology of using photographs:

-Pink S. *Doing visual ethnography: Images, media and representation in research*. London: SAGE, 2000.

-Wiles R, Prosser J, Bagnoli A, Clark A, Davies K, Holland S, Renold E. *ESRC national Centre for Research Methods: ESRC National Centre for Research Methods Review Paper: Visual Ethics: Ethical Issues in Visual 2008*. [Online] Retrieved from:

<http://eprints.ncrm.ac.uk/421/1/MethodsReviewPaperNCRM-011.pdf> (accessed 31st October 2011)

Reviewer comment: Page 8: I didn't understand what was meant by the following:

"Repeated reading of the interview transcripts will occur for compound meaning."

Author response: The phrasing; 'occur for compound meaning' changed to 'assist the reader in viewing the transcript from different perspectives'

Reviewer comment: I didn't understand what was meant by the following "Existing literature will be used to delimit the framework..."

Author response: Reworded to: "The framework will be considered in terms of the existing literature,

to determine whether the emerging patterns are well described or novel”

Reviewer comment: Page 11: I didn't understand what was meant by the following:

“...the poignant themes arising from interviews...”

Author response: 'poignant' changed to 'emerging'

Reviewer Comment: I didn't understand what was meant by the following:

“There are several key areas that dissemination will likely focus...”

Author Response: This sentence has been removed.

Reviewer comment: Page 12: I thought the section beginning “Complexity and cost...” might be better in the introduction.

Author response: This section has been moved to the introduction as suggested
